# Supplementary material for: Quantum molecular resonance electrotherapy (Rexon-Eye) for recalcitrant dry eye in an Asian population
Source: PubMed Central journal article supplement (PMC10523309; doi:10.3389/fmed.2023.1209886), 2023-09-12
Supplement: Presentation_1.pdf [file Presentation_1.pdf]

## Supplementary Appendix 1

### QUEST and Acceptability and Satisfaction Questionnaire

|                                                                             |                                                                                                                                                                                                                                                             | <b>Notes</b>                                            |
|-----------------------------------------------------------------------------|-------------------------------------------------------------------------------------------------------------------------------------------------------------------------------------------------------------------------------------------------------------|---------------------------------------------------------|
| The situation compared to <u>before treatment</u> is now:                   | <input type="checkbox"/> better<br><input type="checkbox"/> same<br><input type="checkbox"/> worse                                                                                                                                                          |                                                         |
| The situation compared to <u>end of treatment</u> is now:                   | <input type="checkbox"/> better<br><input type="checkbox"/> same<br><input type="checkbox"/> worse                                                                                                                                                          | Indicate what treatment was used after end of treatment |
| The situation compared to <u>1 month after end of treatment</u> is now:     | <input type="checkbox"/> better<br><input type="checkbox"/> same<br><input type="checkbox"/> worse                                                                                                                                                          |                                                         |
| During <u>last week</u> I experienced these eye symptoms:                   | <input type="checkbox"/> none<br><input type="checkbox"/> pain<br><input type="checkbox"/> burning<br><input type="checkbox"/> sand<br><input type="checkbox"/> dryness<br><input type="checkbox"/> photophobia<br><input type="checkbox"/> other (specify) |                                                         |
| During <u>last week</u> I used tear substitutes during the day:             | <input type="checkbox"/> yes<br><input type="checkbox"/> no                                                                                                                                                                                                 | Indicate no. of times eyedrops used per day             |
| During <u>last week</u> I used tear substitutes during the evening / night: | <input type="checkbox"/> yes<br><input type="checkbox"/> no                                                                                                                                                                                                 |                                                         |
| In the <u>last 2 months</u> I had eye problems other than dry eye:          | <input type="checkbox"/> yes<br><input type="checkbox"/> no                                                                                                                                                                                                 |                                                         |
| In the <u>last 2 months</u> I used tear substitutes:                        | <input type="checkbox"/> yes<br><input type="checkbox"/> no                                                                                                                                                                                                 |                                                         |
| In the <u>last 2 months</u> I tried to suspend using tear substitutes       | <input type="checkbox"/> yes, and it worked<br><input type="checkbox"/> yes, but it did not work and I resumed using tear substitutes<br><input type="checkbox"/> no                                                                                        |                                                         |

|                                                                                          |                                                                                                    |  |
|------------------------------------------------------------------------------------------|----------------------------------------------------------------------------------------------------|--|
| Compared to <u>before treatment</u> my eyes now produce more tears                       | <input type="checkbox"/> yes<br><input type="checkbox"/> no<br><input type="checkbox"/> don't know |  |
| Compared to <u>before treatment</u> my eyes now are more wet (tears are more effective): | <input type="checkbox"/> yes<br><input type="checkbox"/> no<br><input type="checkbox"/> don't know |  |
| Compared to <u>before treatment</u> my eyes now feel better:                             | <input type="checkbox"/> yes<br><input type="checkbox"/> no<br><input type="checkbox"/> don't know |  |
| Compared to <u>before treatment</u> I have reduced the use of tear substitutes:          | <input type="checkbox"/> yes<br><input type="checkbox"/> no<br><input type="checkbox"/> don't know |  |
| Overall, I judge the treatment as pleasant:                                              | <input type="checkbox"/> yes<br><input type="checkbox"/> no<br><input type="checkbox"/> neutral    |  |
| Overall, I judge the treatment as effective:                                             | <input type="checkbox"/> yes<br><input type="checkbox"/> no<br><input type="checkbox"/> neutral    |  |
| Overall, I judge the treatment as durable:                                               | <input type="checkbox"/> yes<br><input type="checkbox"/> no<br><input type="checkbox"/> neutral    |  |
| Overall, I judge the treatment, with respect to other treatments I tried:                | <input type="checkbox"/> better<br><input type="checkbox"/> same<br><input type="checkbox"/> worse |  |
